# Supplementary material for: Overexpression of HMGA1 Figures as a Potential Prognostic Factor in Endometrioid Endometrial Carcinoma (EEC)
Source: PubMed Central journal article supplement (PMC6562754; doi:10.3390/genes10050372), 2019-05-15
Supplement: genes-10-00372-s001.pdf [file genes-10-00372-s001.pdf]

1A

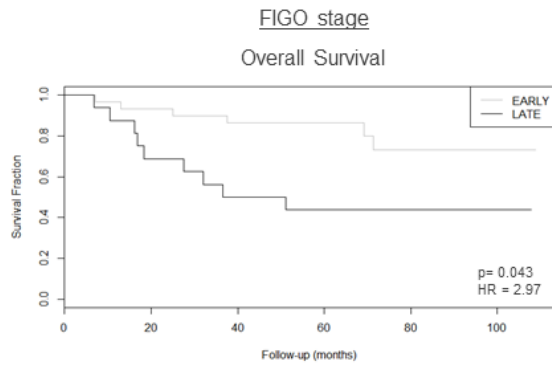

1B

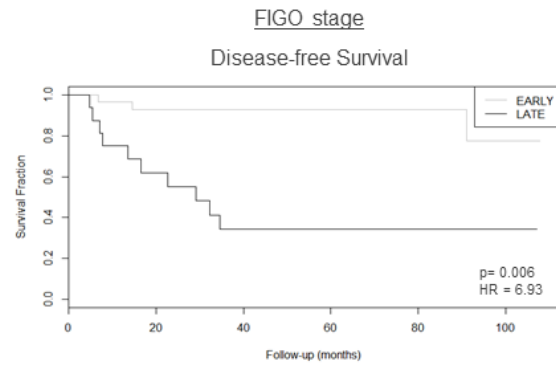

**Figure S1.** The Kaplan–Meier method was used to evaluate overall survival (1A) and disease-free survival (1B), based on a confidence interval of 95%. Data with  $p < 0.05$  were considered statistically significant. Survival data of patients were plotted according to tumor stage: IA, IB and II were considered early stages; III and IV were considered late stages. Data were adjusted by stage and *HMG1* expression in overall survival analysis and by stage, age and histological grade in disease-free survival analysis.

**Table S1.** Sequences of the five pairs of oligonucleotides sequences used in the study.

---

| <b><u>Oligonucleotides sequences</u></b>                                                                  |
|-----------------------------------------------------------------------------------------------------------|
| <b><u>GAPDH</u></b><br>Forward: 5' CAACAGCCTCAAGATCATCAGCAA 3'<br>Reverse: 5' AGTGATGGCATGGACTGTGGTCAT 3' |
| <b><u>HMGA1</u></b><br>Forward: 5' AAAAGGACGGCACTGAGAAG 3'<br>Reverse: 5' CTCTAGGTGTTGGCACTTCG 3'         |
| <b><u>HMGA2</u></b><br>Forward: 5' GCGCCTCAGAAGAGAGGAC 3'<br>Reverse: 5' GGTCTCTTAGGAGAGGGCTCA 3'         |
| <b><u>HMGA1P6</u></b><br>Forward: 5'GCAGACCCACAAAAGTGA 3'<br>Reverse: 5' GAGCAAAGCTGTCCCATCC              |
| <b><u>HMGA1P7</u></b><br>Forward: 5' GCTCCTTCTCGGCTCCTC 3'<br>Reverse: 5' GCTTGGGCCTCTTTTATGG 3'          |

---

**Table S2:** Correlations between *HMGAI* gene expression and baseline characteristics of patients.

| Characteristics                    | ≤ 0.089726* | >0.089726* | p value       |
|------------------------------------|-------------|------------|---------------|
| <b>Hypertension</b>                |             |            |               |
| Yes                                | 14 (48.3%)  | 15 (51.7%) | 1.0000        |
| No                                 | 9 (52.9%)   | 8 (47.1%)  |               |
| <b>Diabetes</b>                    |             |            |               |
| Yes                                | 6 (66.7%)   | 3 (33.3%)  | 0.4591        |
| No                                 | 17 (45.9%)  | 20 (54.1%) |               |
| <b>Heart diseases</b>              |             |            |               |
| Yes                                | 1 (25.0%)   | 3 (75.0%)  | 0.6076        |
| No                                 | 22 (52.4%)  | 20 (47.6%) |               |
| <b>Obesity or Overweight</b>       |             |            |               |
| Yes                                | 18 (51.4%)  | 17 (48.6%) | 1.0000        |
| No                                 | 5 (45.5%)   | 6 (54.5%)  |               |
| <b>Nulliparity</b>                 |             |            |               |
| Yes                                | 4 (66.7%)   | 2 (33.3%)  | 0.6628        |
| No                                 | 17 (47.2%)  | 19 (52.8%) |               |
| <b>Contraceptive use</b>           |             |            |               |
| Yes                                | 6 (54.5%)   | 5 (45.5%)  | 1.0000        |
| No                                 | 16 (50.0%)  | 16 (50.0%) |               |
| <b>Histological Grade</b>          |             |            |               |
| G1                                 | 6 (54.5%)   | 5(45.5%)   |               |
| G2                                 | 13 (59.1%)  | 9 (40.9%)  | 0.2539        |
| G3                                 | 4 (30.8%)   | 9 (69.2%)  |               |
| <b>Recurrence</b>                  |             |            |               |
| Yes                                | 6 (46.2%)   | 7 (53.8%)  | 1.0000        |
| No                                 | 17 (51.5%)  | 16 (48.5%) |               |
| <b>Myometrial Invasion</b>         |             |            |               |
| ≥ 50%                              | 8 (33.3%)   | 16 (66.7%) | <b>0.0377</b> |
| < 50%                              | 15 (68.2%)  | 7 (31.8%)  |               |
| <b>Lymphovascular Infiltration</b> |             |            |               |
| Yes                                | 3 (42.9%)   | 4 (57.2%)  | 0.6843        |
| No                                 | 16(55.2%)   | 13(44.8%)  |               |

*Fisher's exact test*

\* Patients were divided in two groups, according to *HMGAI* mRNA median expression levels (0.089726).

**Table S3:** HMGA1 protein expression by immunohistochemistry in 26 endometrioid endometrial carcinomas

(EEC) samples.

| <b>Histological Type</b> | <b><u>HMGA1 Staining Score (n)</u></b> |    |    |    |    |
|--------------------------|----------------------------------------|----|----|----|----|
|                          | 0                                      | 1+ | 2+ | 3+ | 4+ |
| EEC Stage IA (n=5)       | 0                                      | 3  | 1  | 1  | 0  |
| EEC Stage IB (n=5)       | 0                                      | 0  | 1  | 3  | 1  |
| EEC Stage II (n=5)       | 0                                      | 0  | 2  | 3  | 0  |
| EEC Stage III (n=5)      | 0                                      | 0  | 1  | 2  | 2  |
| EEC Stage IV (n=6)       | 0                                      | 0  | 1  | 1  | 4  |

**Table S4:** Correlations between *HMGA2* gene expression and baseline characteristics of patients.

| <b>Characteristics</b>             | <b>≤ 0.008599*</b> | <b>&gt;0.008599*</b> | <b>p value</b> |
|------------------------------------|--------------------|----------------------|----------------|
| <b>Hypertension</b>                |                    |                      |                |
| <b>Yes</b>                         | 16 (55.2%)         | 13 (44.8%)           | 0.5422         |
| <b>No</b>                          | 7 (41.2%)          | 10 (58.8%)           |                |
| <b>Diabetes</b>                    |                    |                      |                |
| <b>Yes</b>                         | 5 (55.6%)          | 4 (44.4%)            | 1.0000         |
| <b>No</b>                          | 18 (48.6%)         | 19 (51.4%)           |                |
| <b>Heart diseases</b>              |                    |                      |                |
| <b>Yes</b>                         | 3 (75%)            | 1 (25%)              | 0.6078         |
| <b>No</b>                          | 20 (47.6%)         | 22 (52.4%)           |                |
| <b>Obesity or Overweight</b>       |                    |                      |                |
| <b>Yes</b>                         | 18 (51.4%)         | 17 (48.6%)           | 0.4966         |
| <b>No</b>                          | 4 (36.4%)          | 7 (63.6%)            |                |
| <b>Nulliparity</b>                 |                    |                      |                |
| <b>Yes</b>                         | 4 (66.7%)          | 2 (33.3%)            | 0.1249         |
| <b>No</b>                          | 18 (50%)           | 18 (50%)             |                |
| <b>Contraceptive use</b>           |                    |                      |                |
| <b>Yes</b>                         | 4 (36.4%)          | 7 (63.6%)            | 0.3102         |
| <b>No</b>                          | 18 (56.3%)         | 14 (43.7%)           |                |
| <b>Histological grade</b>          |                    |                      |                |
| <b>G1</b>                          | 5 (45.5%)          | 6 (54.5%)            | 0.4699         |
| <b>G2</b>                          | 13 (59.1%)         | 9 (40.9%)            |                |
| <b>G3</b>                          | 5 (38.5%)          | 8 (61.5%)            |                |
| <b>Recurrence</b>                  |                    |                      |                |
| <b>Yes</b>                         | 5 (38.5%)          | 8 (61.5%)            | 0.3141         |
| <b>No</b>                          | 19 (55.9%)         | 15 (44.1%)           |                |
| <b>Myometrial Invasion</b>         |                    |                      |                |
| <b>≥ 50%</b>                       | 14 (58.3%)         | 10 (41.7%)           | 0.3762         |
| <b>&lt; 50%</b>                    | 9 (40.9%)          | 13 (59.1%)           |                |
| <b>Lymphovascular Infiltration</b> |                    |                      |                |
| <b>Yes</b>                         | 3 (42.9%)          | 4 (57.1%)            | 0.4178         |
| <b>No</b>                          | 18 (62.1%)         | 11 (37.9%)           |                |

*Fisher's exact test*

\* Patients were divided in two groups, according to *HMGA2* mRNA median expression levels (0.008599).

**Table S5:** HMGA2 protein expression by immunohistochemistry in 26 endometrioid endometrial carcinomas (EEC) samples.

| <b>Histological Type</b> | <b><u>HMGA2 Staining Score (n)</u></b> |           |           |           |           |
|--------------------------|----------------------------------------|-----------|-----------|-----------|-----------|
|                          | <b>0</b>                               | <b>1+</b> | <b>2+</b> | <b>3+</b> | <b>4+</b> |
| EEC Stage IA (n=5)       | 0                                      | 3         | 1         | 1         | 0         |
| EEC Stage IB (n=5)       | 0                                      | 0         | 1         | 2         | 2         |
| EEC Stage II (n=5)       | 0                                      | 0         | 2         | 3         | 0         |
| EEC Stage III (n=5)      | 0                                      | 0         | 1         | 3         | 1         |
| EEC Stage IV (n=6)       | 0                                      | 0         | 1         | 3         | 2         |
